# Supplementary material for: Ethylene induced plant stress tolerance by Enterobacter sp. SA187 is mediated by 2‐keto‐4‐methylthiobutyric acid production
Source: PubMed Central journal article supplement (PMC5875868; doi:10.1371/journal.pgen.1007273), 2018-03-19
Supplement: pgen.1007273.s002.pdf [file pgen.1007273.s002.pdf]

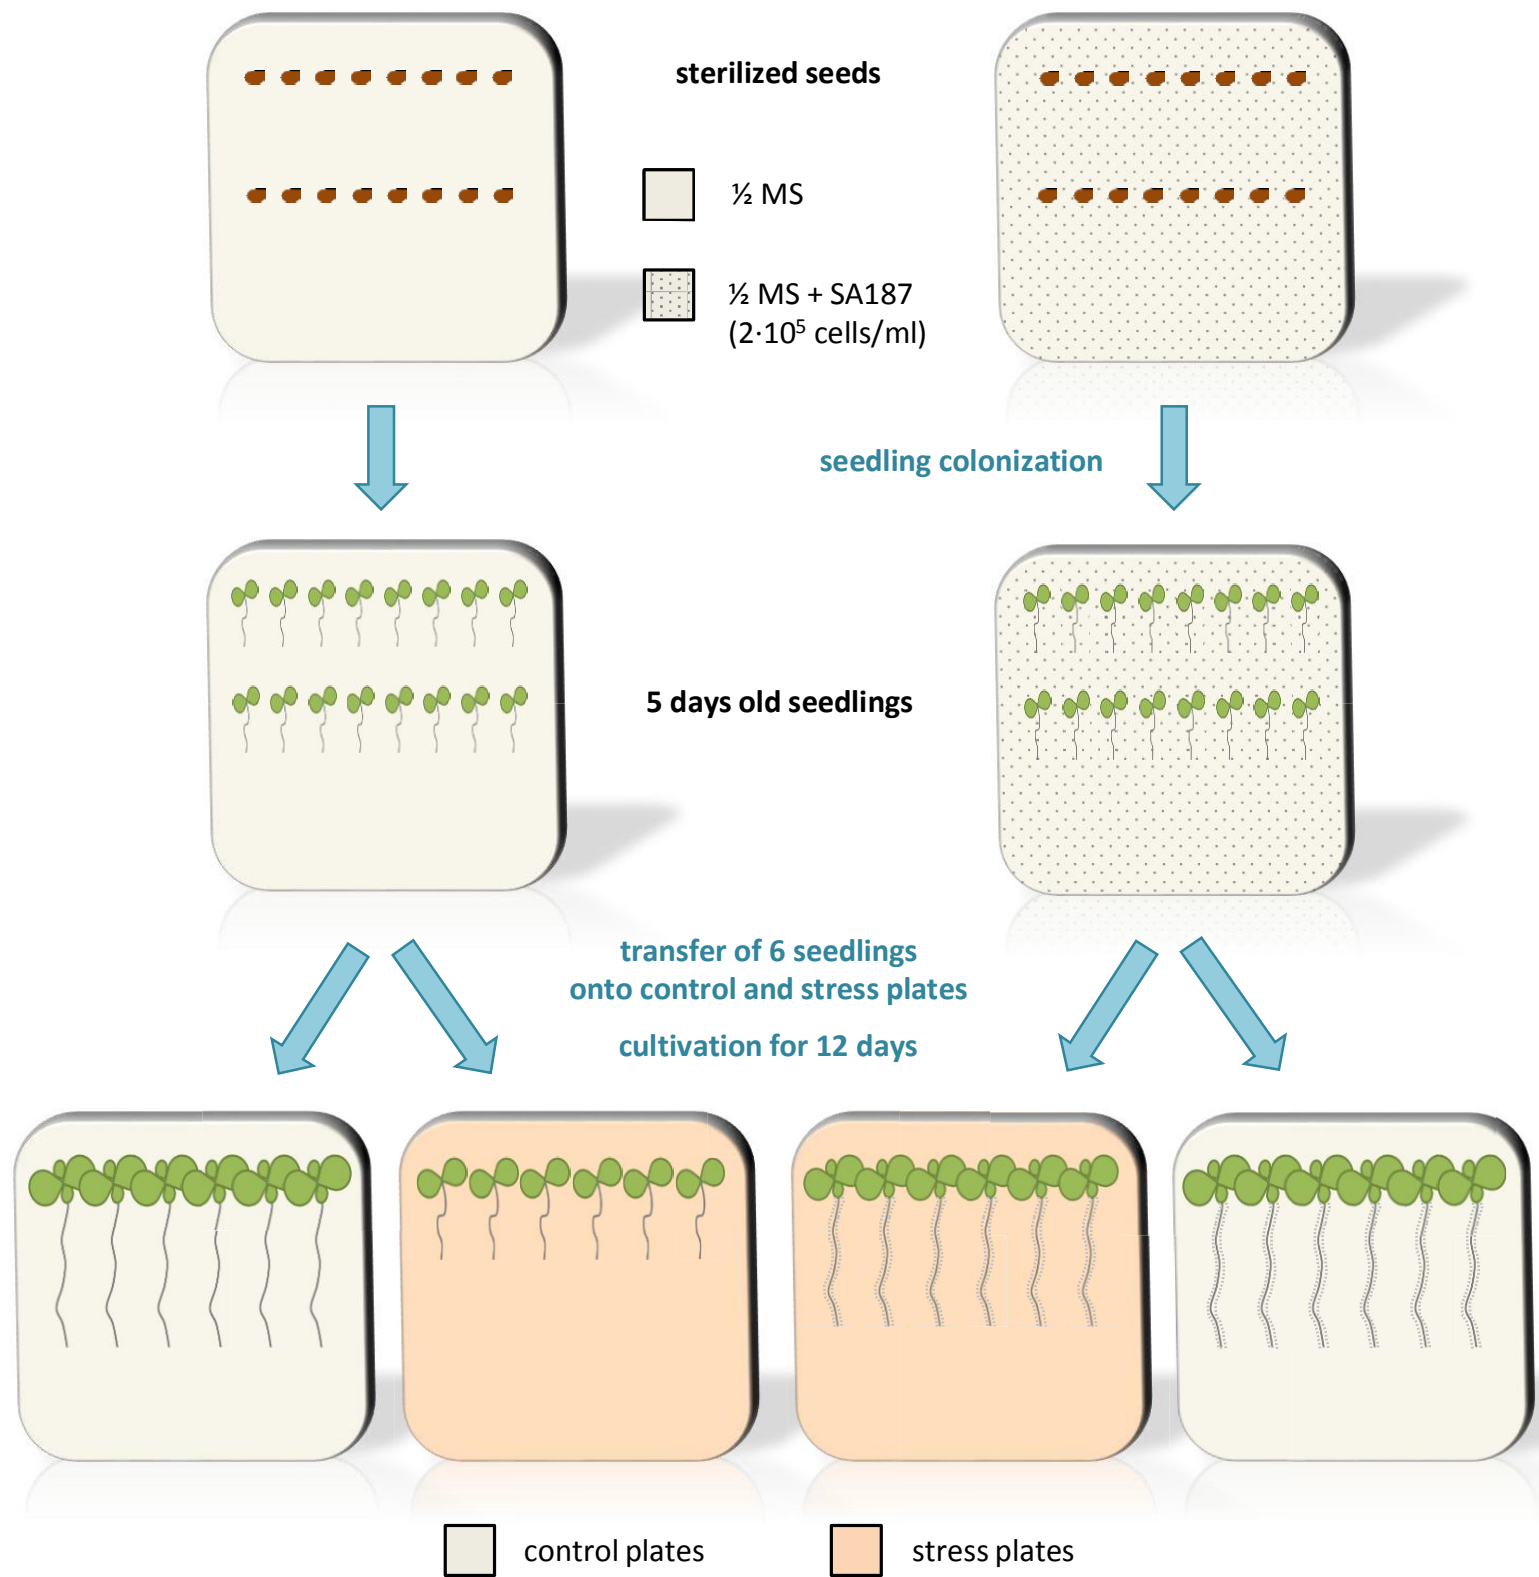

**Figure S2. Scheme of the SA187 inoculation and plant treatments.**

Sterilized seeds were placed on agar plates containing either ½ MS or ½ MS + SA187 (2·10<sup>5</sup> cells/ml), defining the mock- and SA187-inoculated plants, respectively. Five days after germination, mock- and SA187-inoculated seedlings were transferred onto control agar plates (½ MS) or salt-stress agar plates (containing 100 mM NaCl) to evaluate plant tolerance to the salt stress.
