# Supplementary material for: Ethylene induced plant stress tolerance by Enterobacter sp. SA187 is mediated by 2‐keto‐4‐methylthiobutyric acid production
Source: PubMed Central journal article supplement (PMC5875868; doi:10.1371/journal.pgen.1007273), 2018-03-19
Supplement: pgen.1007273.s003.pdf [file pgen.1007273.s003.pdf]

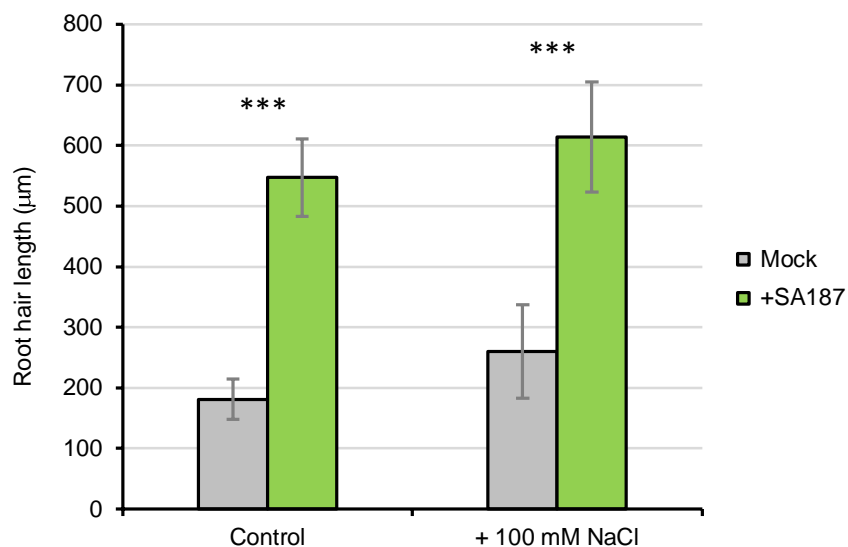

**Figure S3. Root hair length of 16-day-old seedlings.**

Average root hair length of 10% longest root hairs ( $n > 100$ ) of 16-day-old seedlings grown vertically on  $\frac{1}{2}$  MS medium with or without 100 mM NaCl. Seedlings were transferred to such agar plates 5 days after germination from  $\frac{1}{2}$  MS agar plates without (Mock) or with SA187. Only root hairs that emerged after the seedling transfer were measured. Error bars represent SD. Asterisks indicate a statistical difference based on the Student's t-test (\*\*\*)  $P < 0.001$ .
