# Supplementary material for: Ethylene induced plant stress tolerance by Enterobacter sp. SA187 is mediated by 2‐keto‐4‐methylthiobutyric acid production
Source: PubMed Central journal article supplement (PMC5875868; doi:10.1371/journal.pgen.1007273), 2018-03-19
Supplement: pgen.1007273.s004.pdf [file pgen.1007273.s004.pdf]

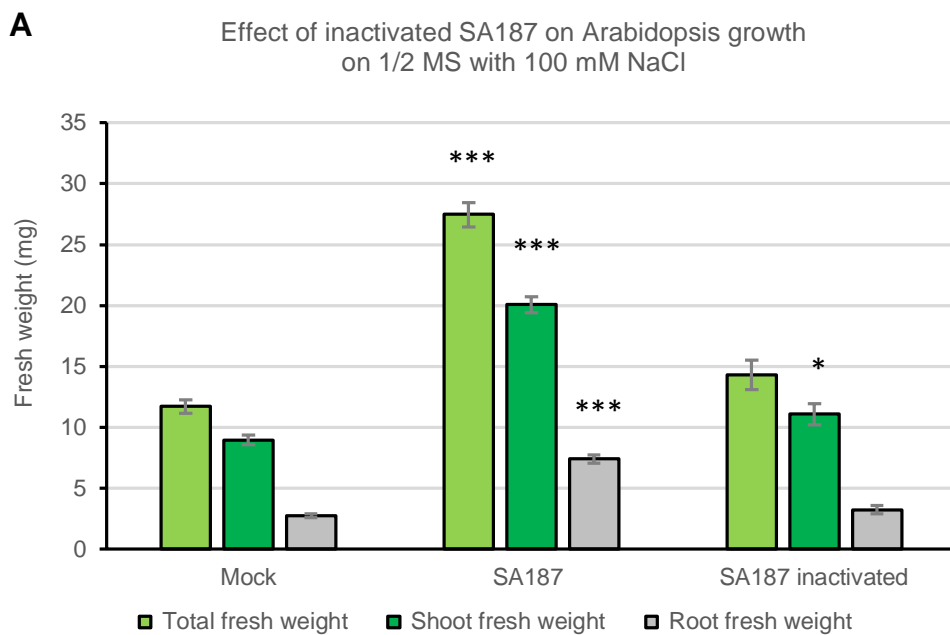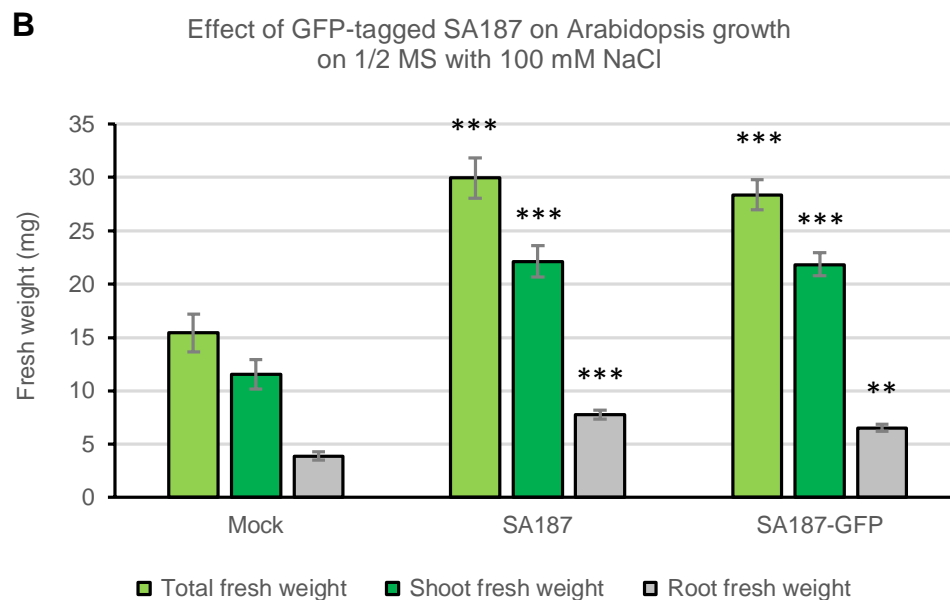

**Figure S4. The effect of inactivated and GFP-tagged SA187 on Arabidopsis growth.**

(A) Fresh weight of 17-day-old Arabidopsis seedlings exposed to salt stress ( $\frac{1}{2}$  MS + 100mM NaCl) for 12 days in the presence of heat-inactivated SA187 in comparison to living SA187. Error bars represent SE. Asterisks indicate a statistical difference to Mock based on the Student's t-test (\*  $P < 0.05$ ; \*\*  $P < 0.01$ ; \*\*\*  $P < 0.001$ ).

(B) Fresh weight of 17-day-old Arabidopsis seedlings exposed to salt stress ( $\frac{1}{2}$  MS + 100mM NaCl) for 12 days colonized by GFP-tagged SA187 in comparison to wild-type SA187. No significant difference was recorded between SA187 and SA187-GFP. Error bars represent SE. Asterisks indicate a statistical difference to Mock based on the Student's t-test (\*  $P < 0.05$ ; \*\*  $P < 0.01$ ; \*\*\*  $P < 0.001$ ).
