# Supplementary material for: Ethylene induced plant stress tolerance by Enterobacter sp. SA187 is mediated by 2‐keto‐4‐methylthiobutyric acid production
Source: PubMed Central journal article supplement (PMC5875868; doi:10.1371/journal.pgen.1007273), 2018-03-19
Supplement: pgen.1007273.s005.pdf [file pgen.1007273.s005.pdf]

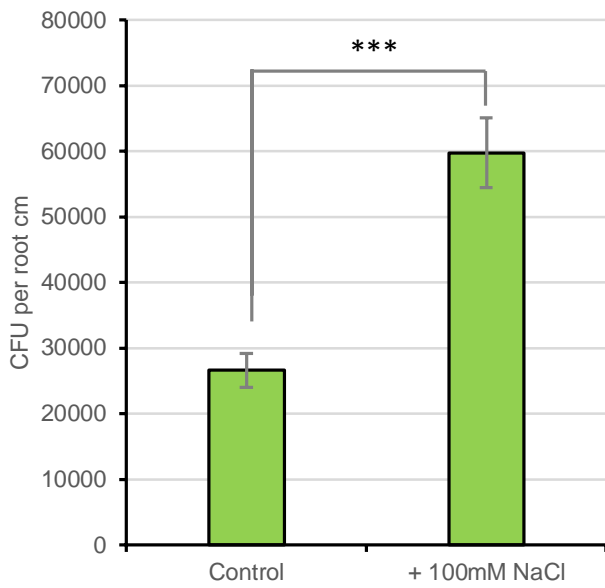

**Figure S5. Quantification of root colonization by SA187.**

Efficiency of root colonization evaluated by counting colony forming units (CFU) and normalized per root centimeter. Seedlings were grown on  $\frac{1}{2}$  MS medium (Control) or  $\frac{1}{2}$  MS with 100 mM NaCl for 5 days. Bars represent SE,  $n = 9$ , each sample consists of 5 roots. Asterisks indicate a statistical difference based on the Student's t-test (\*\*\*)  $P < 0.001$ .
