# Supplementary material for: Ethylene induced plant stress tolerance by Enterobacter sp. SA187 is mediated by 2‐keto‐4‐methylthiobutyric acid production
Source: PubMed Central journal article supplement (PMC5875868; doi:10.1371/journal.pgen.1007273), 2018-03-19
Supplement: pgen.1007273.s006.pdf [file pgen.1007273.s006.pdf]

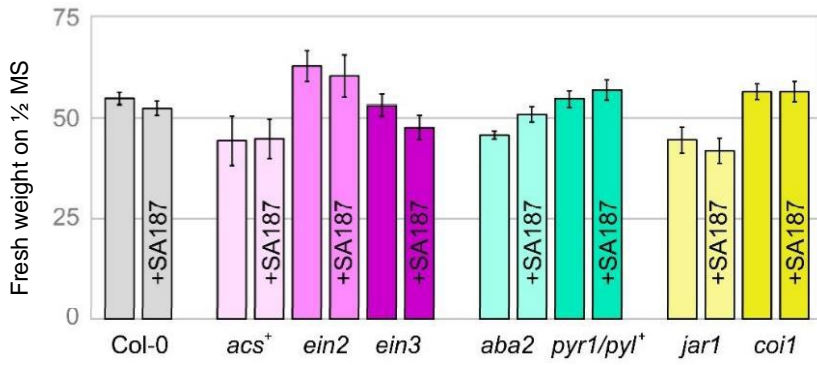

**Figure S6. Growth of SA187-treated Arabidopsis mutants in hormonal pathways under normal conditions.**

Fresh weight (mg) of mock- and SA187-inoculated plants after growth on 1/2 MS for 17 days.

<sup>+</sup> *acs* represents the heptuple mutant *acs1-1 acs2-1 acs4-1 acs5-2 acs6-1 acs7-1 acs9-1*, and *pyr1/pyl* the quadruple mutant *pyr1 pyl1 pyl2 pyl4*.
