# Supplementary material for: Ethylene induced plant stress tolerance by Enterobacter sp. SA187 is mediated by 2‐keto‐4‐methylthiobutyric acid production
Source: PubMed Central journal article supplement (PMC5875868; doi:10.1371/journal.pgen.1007273), 2018-03-19
Supplement: pgen.1007273.s007.pdf [file pgen.1007273.s007.pdf]

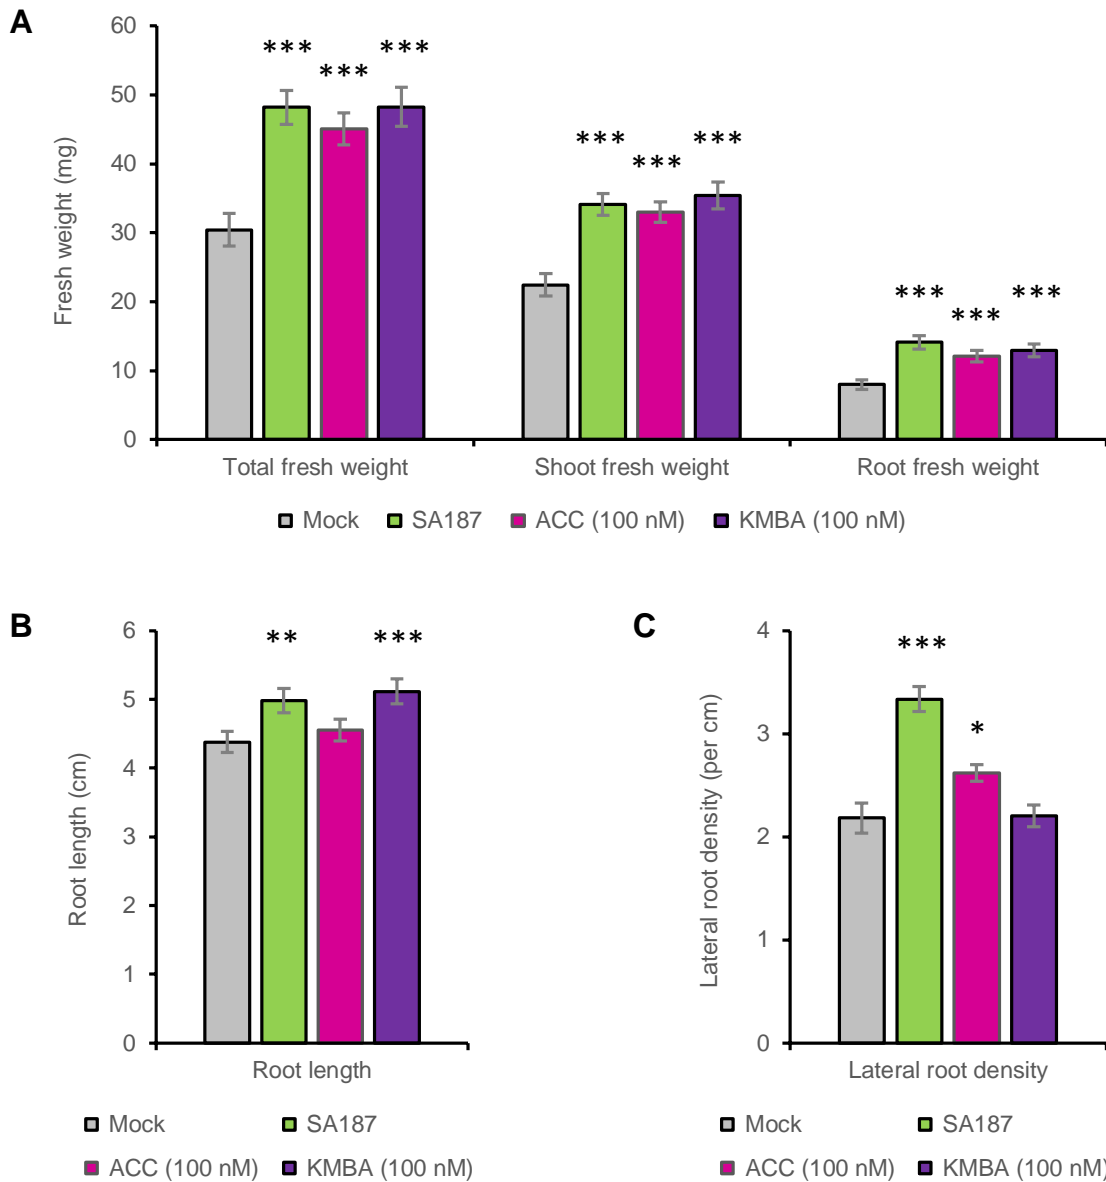

**Figure S7. The effect of ACC and KMBA treatment on Arabidopsis growth in comparison to SA187-inoculated seedlings.**

Complete data to spider graphs in Figure 7C and Figure 8B. Fresh weight (A), root length (B), and lateral root density (C) of 17-day-old seedlings grown on  $\frac{1}{2}$  MS + 100 mM NaCl for the last 12 days. Values represent means of three biological experiments, each in two technical replicates (> 33 seedlings). Error bars represent SE. Asterisks indicate a statistical difference from mock-inoculated plants based on Student t-test (\* P < 0.05; \*\* P < 0.01; \*\*\* P < 0.001).
